# Supplementary material
Source: publisher figshare collection journal article supplement (https://gsajournals.figshare.com/ndownloader/files/28005759)
Supplement: Supplementary file 1 [file 28005759]

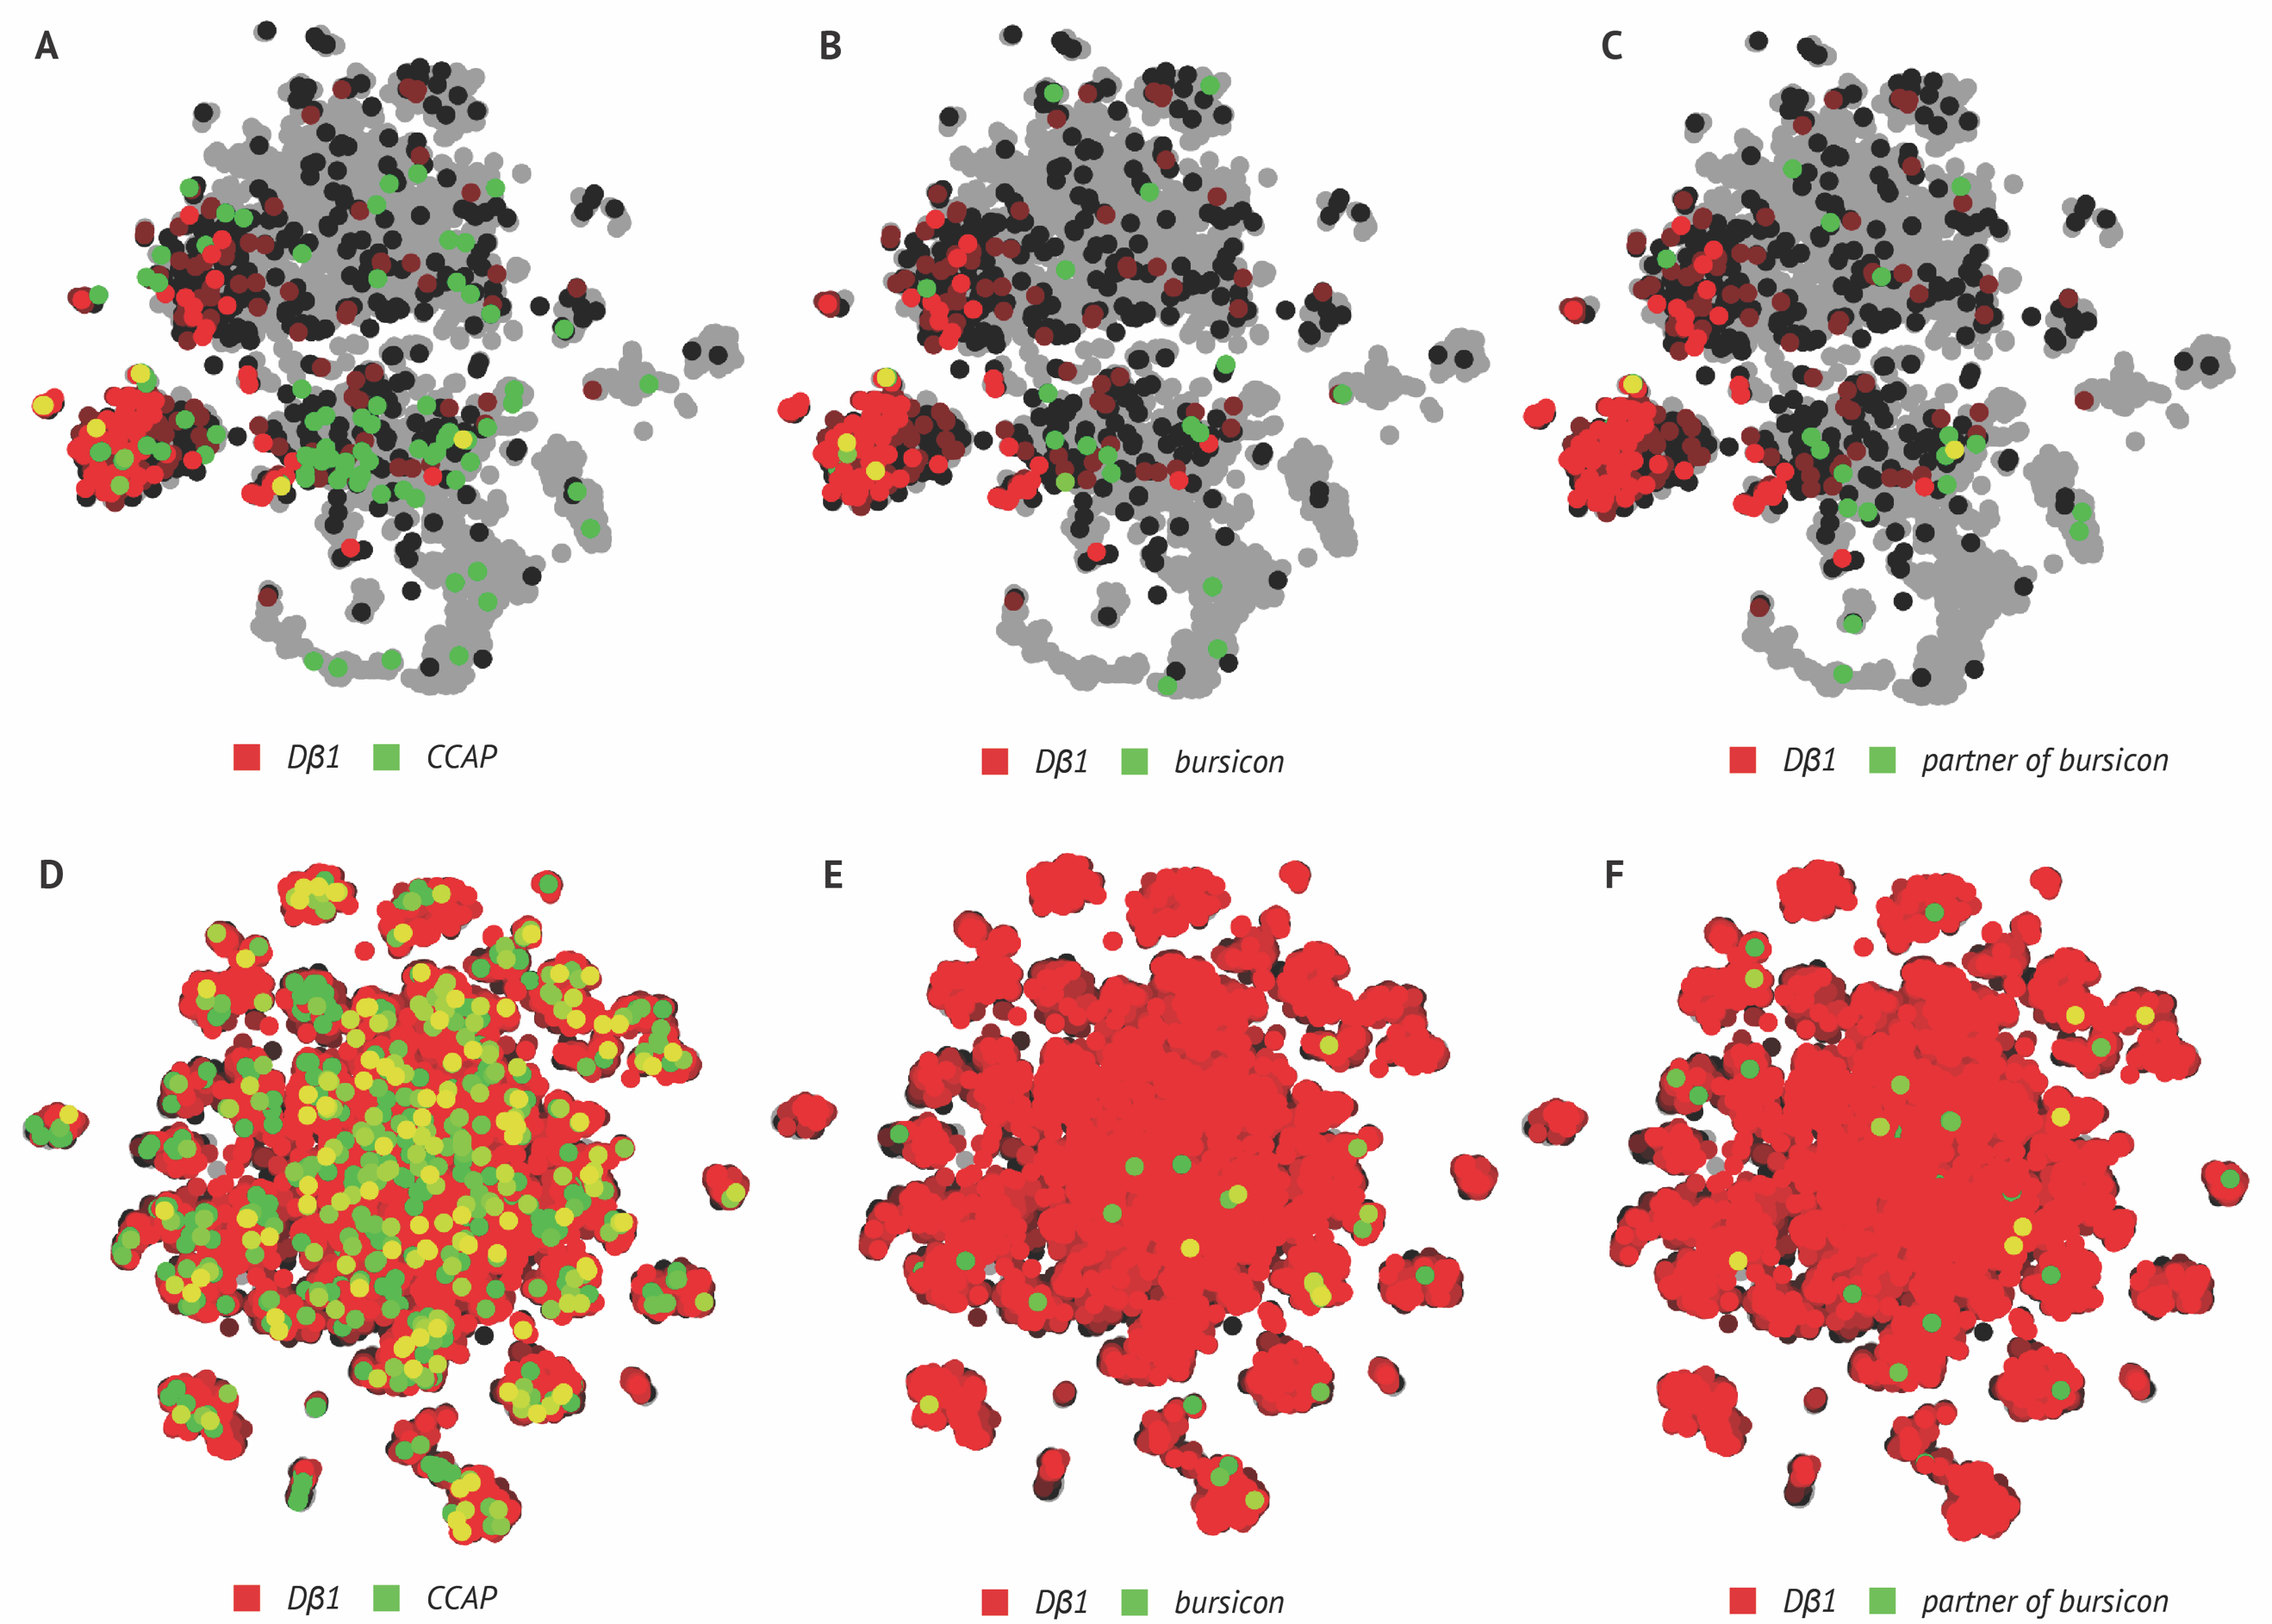


**Figure S9 Available single-cell RNAseq data reveal coexpression of *Dβ1*, *CCAP, bursicon* and *partner of bursicon***

Two-dimensional representation of cells in the larval brain (A-C) and the cells in the adult ventral nerve cord (D-F). Cells expressing *Dβ1* are red, cells expressing either *CCAP, bursicon* or *partner of bursicon* are green, and cells that express both genes have a blended colour (if expression is equal, cells appear yellow). Datasets for the larval brain (Ravenscroft *et al.* 2020) and the adult ventral nerve cord (Allen *et al.* 2020) were accessed via Scope (<https://scope.aertslab.org/)>.
